# Supplementary material for: Experimental and molecular modelling studies of overbased detergent particles
Source: Royal Society of Chemistry journal article supplement (doi:10.1039/b004361n), 2000-01-01
Supplement: figures.doc [file figures.doc]

ESI Figure S1

EPS Figure S2

a)

b)

EPS Figure S2(continued)

c)

d)
